# Supplementary material for: A bipartite sorting signal ensures specificity of retromer complex in membrane protein recycling
Source: PubMed Central journal article supplement — J Cell Biol. 2019 Jul 23;218(9):2876–86. doi: 10.1083/jcb.201901019 (PMC6719449; doi:10.1083/jcb.201901019), 2019-07-23
Supplement: JCB_201901019_sm.pdf [file JCB_201901019_sm.pdf]

## Supplemental material

Suzuki et al., <https://doi.org/10.1083/jcb.201901019>

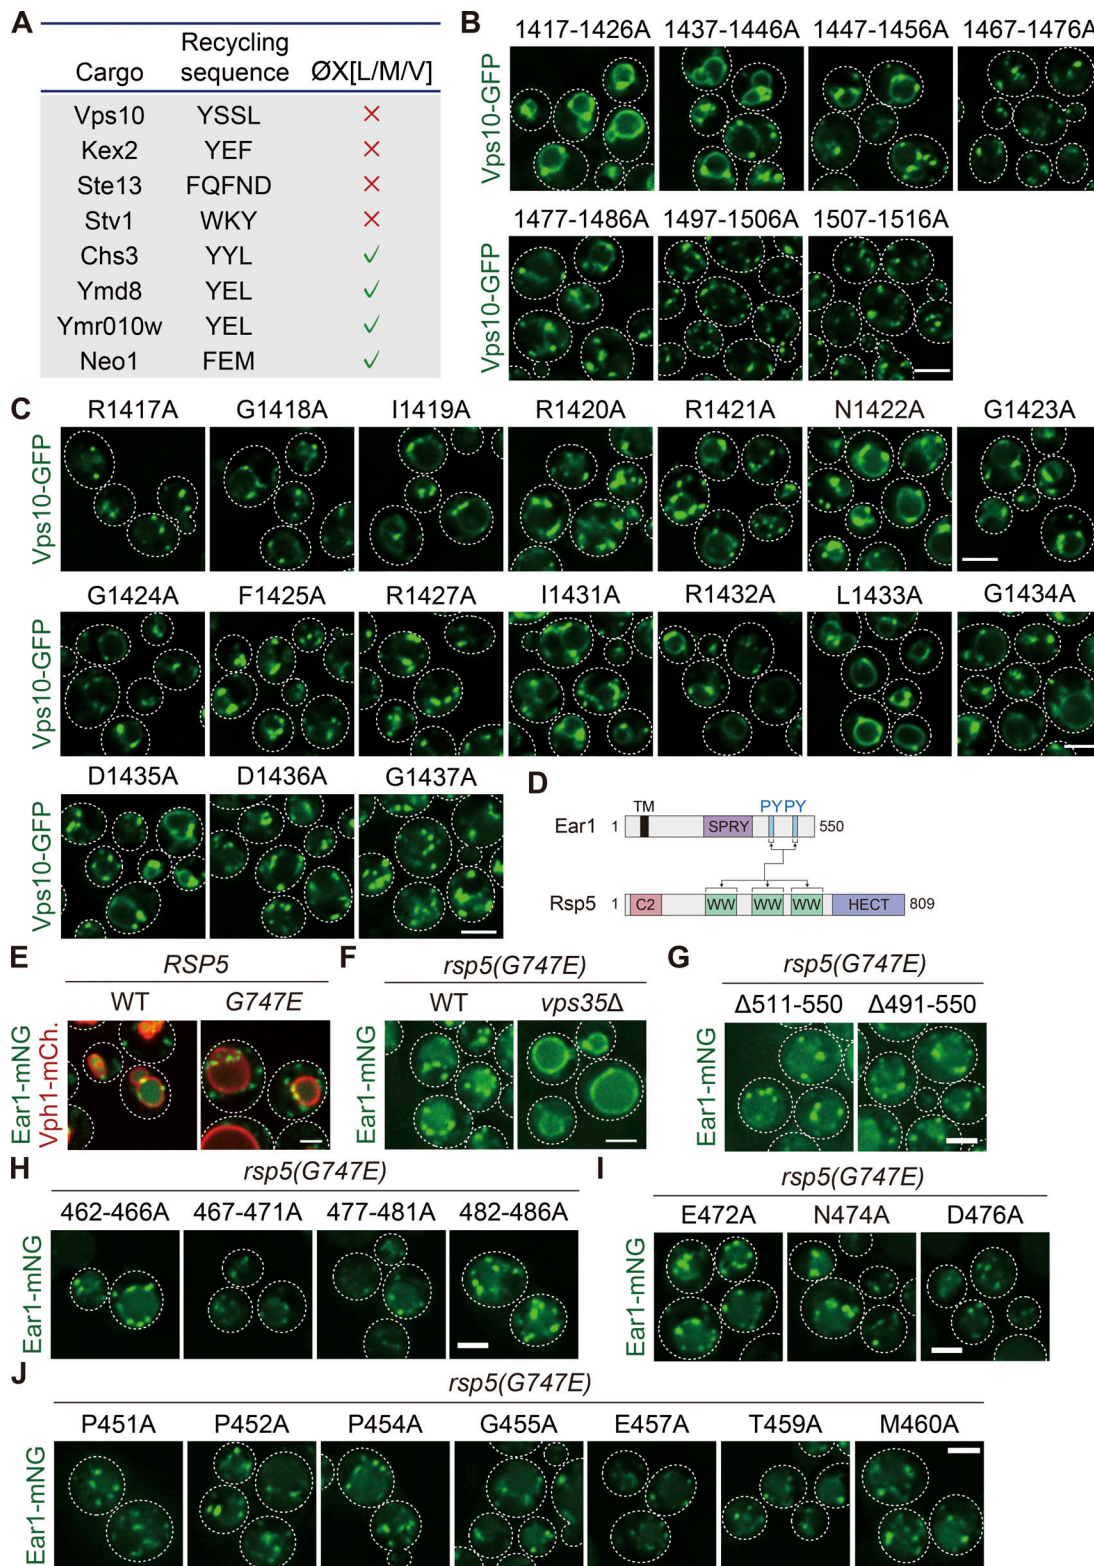

Figure S1. **The localization of Vps10-GFP and Ear1-mNeonGreen mutants. (A)** Schematic of the recycling sequence in yeast. **(B and C)** The localization of Vps10-GFP mutants. **(D)** Schematic of the Ear1-Rsp5 interaction. **(E)** Ear1-mNeonGreen localization in WT or *rsp5 (G747E)* cells. mCh, mCherry. **(F)** Ear1-mNeonGreen localization in *rsp5 (G747E)* or *rsp5 (G747E) vps35Δ* cells. **(G-J)** The localization of Ear1-mNeonGreen mutants in *rsp5 (G747E)* cells. Scale bars: 2 μm.

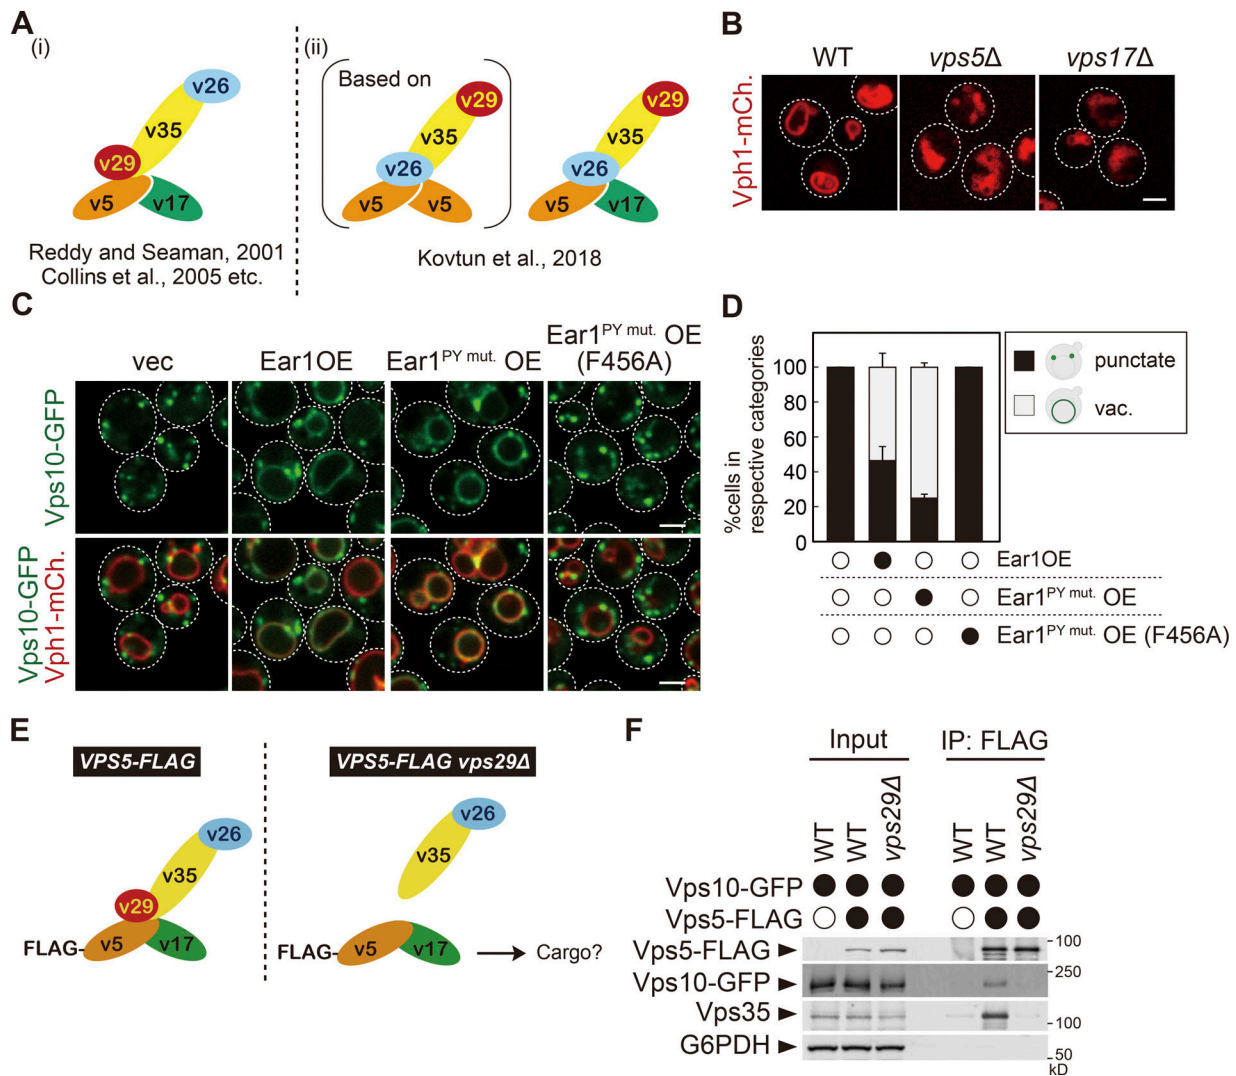

Figure S2. **Analysis of cargo recycling in retromer mutants. (A)** Two models for the retromer assembly. **(B)** The vacuole morphology in WT, *vps5*Δ, or *vps17*Δ cells. **(C)** Vps10-GFP localization in cells overexpressing Ear1 mutants. vec, vector. **(D)** The percentage of each category of Vps10-GFP mutant localization from C. vac, vacuole. **(E and F)** The Vps5-Vps10 interaction in *vps29*Δ cells. Vps5-FLAG was immunoprecipitated (IP) from cells lacking Vps29, and interacting Vps10-GFP was detected by immunoblotting using antibody against FLAG, GFP, Vps35, and G6PDH. For all quantification shown in this figure, at least 30 cells were classified and the data were obtained from three independent experiments. Error bars represent SD. Scale bars: 2 μm.

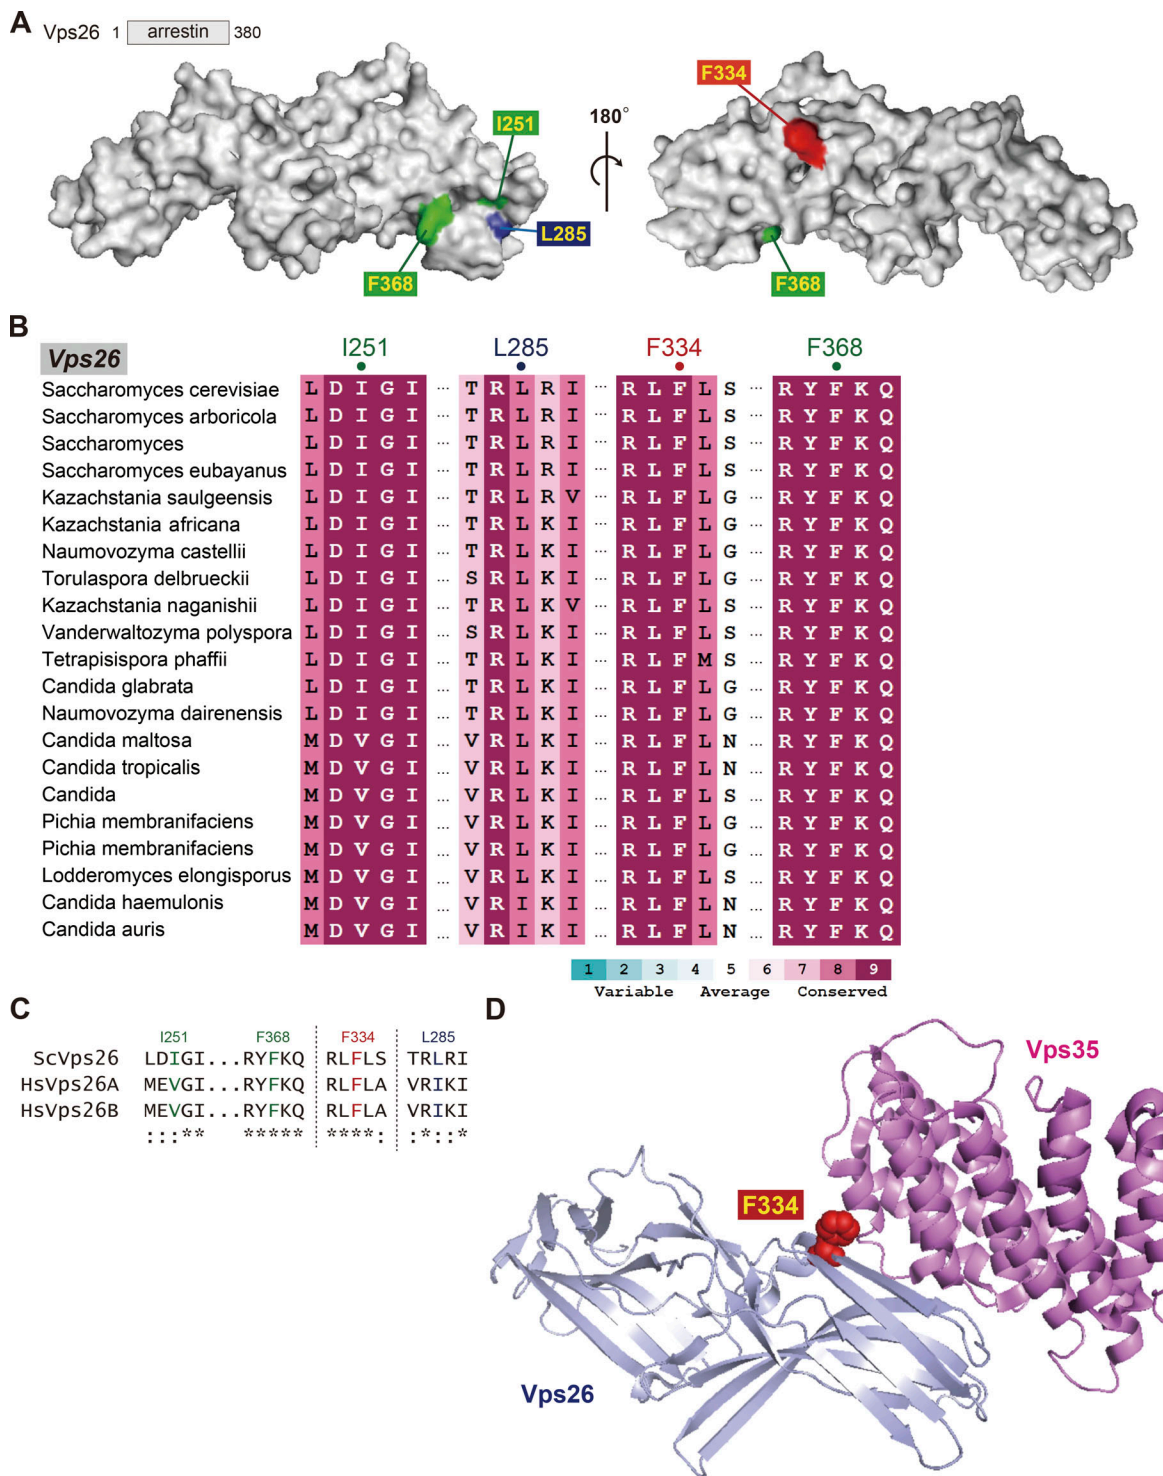

Figure S3. **Analysis of cargo recognition by Vps26.** (A) Mutation sites used in this study are shown on the crystal structure of *Mus musculus* Vps26 (Protein Databank ID code: 2R51). (B) Sequence comparison of Vps26 residues required for cargo retrieval among Vps26 homologues from related species. (C) Sequence comparison of Vps26 residues required for cargo retrieval in *S. cerevisiae* Vps26, *Homo sapiens* Vps26A, and *Homo sapiens* Vps26B. (D) F334 on Vps26 are shown on the crystal structure of *Homo sapiens* Vps26A-Vps35 complex (Protein Databank ID code: 5F0L).

Table S1. **Yeast strains used in this study**

| Strain    | Genotype                                                                                                      | Source                |
|-----------|---------------------------------------------------------------------------------------------------------------|-----------------------|
| SEY6210   | <i>MATa ura3-52 his3-200 leu2-3,112 trp1-901 lys2-801 suc2-9</i>                                              | Robinson et al., 1988 |
| SEY6210.1 | <i>MATa ura3-52 his3-200 leu2-3,112 trp1-901 lys2-801 suc2-9</i>                                              | Robinson et al., 1988 |
| YCY220    | SEY6210, <i>VPH1-mCherry::TRP1</i>                                                                            | This study            |
| YCY950    | SEY6210, <i>VPH1-mCherry::HIS3, vps10Δ::TRP1</i>                                                              | This study            |
| YCY951    | SEY6210, <i>VPH1-mCherry::HIS3, vps10Δ::TRP1, vps35Δ::KanMX6</i>                                              | This study            |
| YCY856    | SEY6210, <i>rsp5Δ::HIS3, VPH1-mCherry::TRP1, pRS415-rsp5(G747E)</i>                                           | This study            |
| YCY755    | SEY6210, <i>rsp5Δ::HIS3, EAR1-mNeonGreen::TRP1, pRS415-rsp5(G747E)</i>                                        | This study            |
| YCY722    | SEY6210, <i>rsp5Δ::HIS3, EAR1-mNeonGreen::TRP1, vps35Δ::KanMX6, pRS415-rsp5(G747E)</i>                        | This study            |
| YCY730    | SEY6210, <i>rsp5Δ::HIS3, EAR1(Δ511-550)-mNeonGreen::TRP1, pRS415-rsp5(G747E)</i>                              | This study            |
| YCY729    | SEY6210, <i>rsp5Δ::HIS3, EAR1(Δ491-550)-mNeonGreen::TRP1, pRS415-rsp5(G747E)</i>                              | This study            |
| YCY728    | SEY6210, <i>rsp5Δ::HIS3, EAR1(Δ471-550)-mNeonGreen::TRP1, pRS415-rsp5(G747E)</i>                              | This study            |
| YCY673    | SEY6210, <i>rsp5Δ::HIS3, EAR1(Δ451-550)-mNeonGreen::TRP1, pRS415-rsp5(G747E)</i>                              | This study            |
| YCY948    | SEY6210.1, <i>VPS10-GFP::HIS3, VPH1-mCherry::TRP1, vps26Δ::KanMX6</i>                                         | This study            |
| YCY960    | SEY6210, <i>rsp5Δ::HIS3, VPH1-mCherry::TRP1, pRS415-rsp5(G747E), vps26Δ::hphNT1</i>                           | This study            |
| SSY896    | SEY6210, <i>VPH1-mCherry::TRP1, vps5Δ::LEU2</i>                                                               | This study            |
| SSY897    | SEY6210, <i>VPH1-mCherry::TRP1, vps17Δ::KanMX6</i>                                                            | This study            |
| SSY894    | SEY6210, <i>VPH1-mCherry::TRP1, vps26Δ::LEU2</i>                                                              | This study            |
| SSY895    | SEY6210, <i>VPH1-mCherry::TRP1, vps29Δ::HIS3</i>                                                              | This study            |
| SSY216    | SEY6210, <i>VPH1-mCherry::TRP1, vps35Δ::KanMX6</i>                                                            | This study            |
| SSY933    | SEY6210, <i>VPS10-GFP::KanMX6, VPH1-mCherry::TRP1</i>                                                         | This study            |
| SSY934    | SEY6210, <i>VPS10-GFP::KanMX6, VPH1-mCherry::TRP1, vps5Δ::LEU2</i>                                            | This study            |
| SSY935    | SEY6210, <i>VPS10-GFP::KanMX6, VPH1-mCherry::TRP1, vps17Δ::HIS3</i>                                           | This study            |
| SSY936    | SEY6210, <i>VPS10-GFP::KanMX6, VPH1-mCherry::TRP1, vps35Δ::HIS3</i>                                           | This study            |
| SSY924    | SEY6210, <i>VPS17-3xHA::TRP1</i>                                                                              | This study            |
| SSY926    | SEY6210, <i>VPS5-3xFLAG::HIS3, VPS17-3xHA::TRP1</i>                                                           | This study            |
| SSY923    | SEY6210, <i>VPS5-3xFLAG::HIS3, vps17Δ::TRP1</i>                                                               | This study            |
| SSY987    | SEY6210, <i>VPS5-3xFLAG::HIS3, VPS17-3xHA::TRP1, vps26Δ::hphNT1</i>                                           | This study            |
| SSY1047   | SEY6210, <i>VPS5-3xFLAG::HIS3, VPS17-3xHA::TRP1, vps29Δ::KanMX6</i>                                           | This study            |
| SSY1048   | SEY6210, <i>VPS5-3xFLAG::HIS3, VPS17-3xHA::TRP1, vps35Δ::KanMX6</i>                                           | This study            |
| SSY970    | SEY6210, <i>pep4Δ::LEU2, prb1Δ::LEU2</i>                                                                      | This study            |
| SSY981    | SEY6210, <i>pep4Δ::LEU2, prb1Δ::LEU2, VPS5-3xFLAG::hphNT1</i>                                                 | This study            |
| SSY1042   | SEY6210, <i>pep4Δ::LEU2, prb1Δ::LEU2, VPS5-3xFLAG::hphNT1, vps29Δ::KanMX6</i>                                 | This study            |
| SSY982    | SEY6210, <i>pep4Δ::LEU2, prb1Δ::LEU2, VPS26-3xFLAG::hphNT1</i>                                                | This study            |
| SSY1043   | SEY6210, <i>pep4Δ::LEU2, prb1Δ::LEU2, VPS26-3xFLAG::hphNT1, vps5Δ::KanMX6</i>                                 | This study            |
| SSY1044   | SEY6210, <i>pep4Δ::LEU2, prb1Δ::LEU2, VPS26-3xFLAG::hphNT1, vps17Δ::KanMX6</i>                                | This study            |
| SSY1045   | SEY6210, <i>pep4Δ::LEU2, prb1Δ::LEU2, VPS26-3xFLAG::hphNT1, vps29Δ::KanMX6</i>                                | This study            |
| SSY1046   | SEY6210, <i>pep4Δ::LEU2, prb1Δ::LEU2, VPS26-3xFLAG::hphNT1, vps35Δ::KanMX6</i>                                | This study            |
| SSY983    | SEY6210, <i>pep4Δ::LEU2, prb1Δ::LEU2, VPS35-3xFLAG::hphNT1</i>                                                | This study            |
| SSY1049   | SEY6210, <i>pep4Δ::LEU2, prb1Δ::LEU2, VPS35-3xFLAG::hphNT1, vps26Δ::KanMX6</i>                                | This study            |
| SSY1050   | SEY6210, <i>VPS17-3xHA::TRP1, pep4Δ::KanMX6</i>                                                               | This study            |
| SSY1051   | SEY6210, <i>VPS5-3xFLAG::HIS3, VPS17-3xHA::TRP1, pep4Δ::KanMX6</i>                                            | This study            |
| SSY1052   | SEY6210, <i>VPS5-3xFLAG::HIS3, VPS17-3xHA::TRP1, vps26Δ::hphNT1, pRS305-VPS26(I251E/F368E), pep4Δ::KanMX6</i> | This study            |
| SSY1053   | SEY6210, <i>VPS5-3xFLAG::HIS3, VPS17-3xHA::TRP1, vps26Δ::hphNT1, pRS305-VPS26(F334E), pep4Δ::KanMX6</i>       | This study            |
| SSY1054   | SEY6210, <i>VPS5-3xFLAG::HIS3, VPS17-3xHA::TRP1, vps26Δ::hphNT1, pRS305-VPS26(L285E), pep4Δ::KanMX6</i>       | This study            |

Table S2. **Plasmids used in this study**

| <b>Name</b>                                | <b>Genotype</b>                               | <b>Source</b>                             |
|--------------------------------------------|-----------------------------------------------|-------------------------------------------|
| pRS416 (vector)                            | <i>CEN URA3</i>                               | <a href="#">Sikorski and Hieter, 1989</a> |
| pRS416-VPS10-GFP                           | <i>pRS416-VPS10-GFP</i>                       | Lab stock                                 |
| pRS416-VPS10( $\Delta$ C)-GFP              | <i>pRS416-VPS10(2-1418)-GFP</i>               | This study                                |
| pRS416-VPS10( $\Delta$ C)-EAR1(C-tail)-GFP | <i>pRS416-VPS10(2-1418)-EAR1(451-550)-GFP</i> | This study                                |
| pRS416-VPS10( $\Delta$ 1517-1579)-GFP      | <i>pRS416-VPS10(2-1516)-GFP</i>               | This study                                |
| pRS416-VPS10(1417-1426A)-GFP               | <i>pRS416-VPS10(1417-1426A)-GFP</i>           | This study                                |
| pRS416-VPS10(1427-1436A)-GFP               | <i>pRS416-VPS10(1427-1436A)-GFP</i>           | This study                                |
| pRS416-VPS10(1437-1446A)-GFP               | <i>pRS416-VPS10(1437-1446A)-GFP</i>           | This study                                |
| pRS416-VPS10(1447-1456A)-GFP               | <i>pRS416-VPS10(1447-1456A)-GFP</i>           | This study                                |
| pRS416-VPS10(1457-1466A)-GFP               | <i>pRS416-VPS10(1457-1466A)-GFP</i>           | This study                                |
| pRS416-VPS10(1467-1476A)-GFP               | <i>pRS416-VPS10(1467-1476A)-GFP</i>           | This study                                |
| pRS416-VPS10(1477-1486A)-GFP               | <i>pRS416-VPS10(1477-1486A)-GFP</i>           | This study                                |
| pRS416-VPS10(1487-1496A)-GFP               | <i>pRS416-VPS10(1487-1496A)-GFP</i>           | This study                                |
| pRS416-VPS10(1497-1506A)-GFP               | <i>pRS416-VPS10(1497-1506A)-GFP</i>           | This study                                |
| pRS416-VPS10(1507-1516A)-GFP               | <i>pRS416-VPS10(1507-1516A)-GFP</i>           | This study                                |
| pRS416-VPS10(R1417A)-GFP                   | <i>pRS416-VPS10(R1417A)-GFP</i>               | This study                                |
| pRS416-VPS10(G1418A)-GFP                   | <i>pRS416-VPS10(G1418A)-GFP</i>               | This study                                |
| pRS416-VPS10(I1419A)-GFP                   | <i>pRS416-VPS10(I1419A)-GFP</i>               | This study                                |
| pRS416-VPS10(R1420A)-GFP                   | <i>pRS416-VPS10(R1420A)-GFP</i>               | This study                                |
| pRS416-VPS10(R1421A)-GFP                   | <i>pRS416-VPS10(R1421A)-GFP</i>               | This study                                |
| pRS416-VPS10(N1422A)-GFP                   | <i>pRS416-VPS10(N1422A)-GFP</i>               | This study                                |
| pRS416-VPS10(G1423A)-GFP                   | <i>pRS416-VPS10(G1423A)-GFP</i>               | This study                                |
| pRS416-VPS10(G1424A)-GFP                   | <i>pRS416-VPS10(G1424A)-GFP</i>               | This study                                |
| pRS416-VPS10(F1425A)-GFP                   | <i>pRS416-VPS10(F1425A)-GFP</i>               | This study                                |
| pRS416-VPS10(R1427A)-GFP                   | <i>pRS416-VPS10(R1427A)-GFP</i>               | This study                                |
| pRS416-VPS10(F1428A)-GFP                   | <i>pRS416-VPS10(F1428A)-GFP</i>               | This study                                |
| pRS416-VPS10(G1429A)-GFP                   | <i>pRS416-VPS10(G1429A)-GFP</i>               | This study                                |
| pRS416-VPS10(E1430A)-GFP                   | <i>pRS416-VPS10(E1430A)-GFP</i>               | This study                                |
| pRS416-VPS10(I1431A)-GFP                   | <i>pRS416-VPS10(I1431A)-GFP</i>               | This study                                |
| pRS416-VPS10(R1432A)-GFP                   | <i>pRS416-VPS10(R1432A)-GFP</i>               | This study                                |
| pRS416-VPS10(L1433A)-GFP                   | <i>pRS416-VPS10(L1433A)-GFP</i>               | This study                                |
| pRS416-VPS10(G1434A)-GFP                   | <i>pRS416-VPS10(G1434A)-GFP</i>               | This study                                |
| pRS416-VPS10(D1435A)-GFP                   | <i>pRS416-VPS10(D1435A)-GFP</i>               | This study                                |
| pRS416-VPS10(D1436A)-GFP                   | <i>pRS416-VPS10(D1436A)-GFP</i>               | This study                                |
| pRS416-VPS10(G1437A)-GFP                   | <i>pRS416-VPS10(G1437A)-GFP</i>               | This study                                |
| pRS416-VPS10(L1438A)-GFP                   | <i>pRS416-VPS10(L1438A)-GFP</i>               | This study                                |
| pRS416-VPS10(I1439A)-GFP                   | <i>pRS416-VPS10(I1439A)-GFP</i>               | This study                                |
| pRS416-VPS10(E1440A)-GFP                   | <i>pRS416-VPS10(E1440A)-GFP</i>               | This study                                |
| pRS416-VPS10(N1441A)-GFP                   | <i>pRS416-VPS10(N1441A)-GFP</i>               | This study                                |
| pRS416-VPS10(N1442A)-GFP                   | <i>pRS416-VPS10(N1442A)-GFP</i>               | This study                                |
| pRS416-VPS10(N1443A)-GFP                   | <i>pRS416-VPS10(N1443A)-GFP</i>               | This study                                |
| pRS416-VPS10(T1444A)-GFP                   | <i>pRS416-VPS10(T1444A)-GFP</i>               | This study                                |
| pRS416-VPS10(D1445A)-GFP                   | <i>pRS416-VPS10(D1445A)-GFP</i>               | This study                                |
| pRS416-VPS10(R1446A)-GFP                   | <i>pRS416-VPS10(R1446A)-GFP</i>               | This study                                |

Table S2. **Plasmids used in this study (Continued)**

| <b>Name</b>                                | <b>Genotype</b>                                              | <b>Source</b> |
|--------------------------------------------|--------------------------------------------------------------|---------------|
| pRS416-EAR1( $\Delta$ C)-GFP               | pRS416-EAR1(2-67)-GFP                                        | This study    |
| pRS416-EAR1( $\Delta$ C)-VPS10(C-tail)-GFP | pRS416-EAR1(2-67)-VPS10(1416-1523)-GFP                       | This study    |
| pRS416-VPS10(1492-1495A)-GFP               | pRS416-VPS10(1492-1495A)-GFP                                 | This study    |
| pRS416-VPS10(1428-1433A)-GFP               | pRS416-VPS10(1428-1433A)-GFP                                 | This study    |
| pRS416-VPS10(1428-1433A/1492-1495A)-GFP    | pRS416-VPS10(1428-1433A+1492-1495A)-GFP                      | This study    |
| pRS416-EAR1-mNeonGreen-3xHA                | pRS416-EAR1-mNeonGreen-3xHA                                  | This study    |
| pRS416-EAR1(452-456A)-mNeonGreen-3xHA      | pRS416-EAR1(452-456A)-mNeonGreen-3xHA                        | This study    |
| pRS416-EAR1(457-461A)-mNeonGreen-3xHA      | pRS416-EAR1(457-461A)-mNeonGreen-3xHA                        | This study    |
| pRS416-EAR1(462-466A)-mNeonGreen-3xHA      | pRS416-EAR1(462-466A)-mNeonGreen-3xHA                        | This study    |
| pRS416-EAR1(467-471A)-mNeonGreen-3xHA      | pRS416-EAR1(467-471A)-mNeonGreen-3xHA                        | This study    |
| pRS416-EAR1(472-476A)-mNeonGreen-3xHA      | pRS416-EAR1(472-476A)-mNeonGreen-3xHA                        | This study    |
| pRS416-EAR1(477-481A)-mNeonGreen-3xHA      | pRS416-EAR1(477-481A)-mNeonGreen-3xHA                        | This study    |
| pRS416-EAR1(482-486A)-mNeonGreen-3xHA      | pRS416-EAR1(482-486A)-mNeonGreen-3xHA                        | This study    |
| pRS416-EAR1(P451A)-mNeonGreen-3xHA         | pRS416-EAR1(P451A)-mNeonGreen-3xHA                           | This study    |
| pRS416-EAR1(P452A)-mNeonGreen-3xHA         | pRS416-EAR1(P452A)-mNeonGreen-3xHA                           | This study    |
| pRS416-EAR1(P453A)-mNeonGreen-3xHA         | pRS416-EAR1(P453A)-mNeonGreen-3xHA                           | This study    |
| pRS416-EAR1(P454A)-mNeonGreen-3xHA         | pRS416-EAR1(P454A)-mNeonGreen-3xHA                           | This study    |
| pRS416-EAR1(G455A)-mNeonGreen-3xHA         | pRS416-EAR1(G455A)-mNeonGreen-3xHA                           | This study    |
| pRS416-EAR1(F456A)-mNeonGreen-3xHA         | pRS416-EAR1(F456A)-mNeonGreen-3xHA                           | This study    |
| pRS416-EAR1(E457A)-mNeonGreen-3xHA         | pRS416-EAR1(E457A)-mNeonGreen-3xHA                           | This study    |
| pRS416-EAR1(F458A)-mNeonGreen-3xHA         | pRS416-EAR1(F458A)-mNeonGreen-3xHA                           | This study    |
| pRS416-EAR1(T459A)-mNeonGreen-3xHA         | pRS416-EAR1(T459A)-mNeonGreen-3xHA                           | This study    |
| pRS416-EAR1(M460A)-mNeonGreen-3xHA         | pRS416-EAR1(M460A)-mNeonGreen-3xHA                           | This study    |
| pRS416-EAR1(E472A)-mNeonGreen-3xHA         | pRS416-EAR1(E472A)-mNeonGreen-3xHA                           | This study    |
| pRS416-EAR1(I473A)-mNeonGreen-3xHA         | pRS416-EAR1(I473A)-mNeonGreen-3xHA                           | This study    |
| pRS416-EAR1(N474A)-mNeonGreen-3xHA         | pRS416-EAR1(N474A)-mNeonGreen-3xHA                           | This study    |
| pRS416-EAR1(L475A)-mNeonGreen-3xHA         | pRS416-EAR1(L475A)-mNeonGreen-3xHA                           | This study    |
| pRS416-EAR1(D476A)-mNeonGreen-3xHA         | pRS416-EAR1(D476A)-mNeonGreen-3xHA                           | This study    |
| pRS416-EAR1(PY mut.)-mNeonGreen-3xHA       | pRS416-EAR1(P398A/Y400A/P483A/Y485A)-mNeonGreen-3xHA         | This study    |
| pRS416-Ear1-pHluorin                       | pRS416-EAR1-pHluorin                                         | This study    |
| pRS416-Ear1(F456A)-pHluorin                | pRS416-EAR1(F465A)-pHluorin                                  | This study    |
| pRS416-Ear1(L475A)-pHluorin                | pRS416-EAR1(L475A)-pHluorin                                  | This study    |
| pCM189                                     | pCM189-TETOFFpro-CYC1pro                                     | This study    |
| pCM189-EAR1 overexpressed                  | pCM189-TETOFFpro-CYC1pro-EAR1                                | This study    |
| pCM189-EAR1(PY mut.) overexpressed         | pCM189-TETOFFpro-CYC1pro-EAR1(P398A/Y400A/P483A/Y485A)       | This study    |
| pCM189-EAR1(PY mut./F456A) overexpressed   | pCM189-TETOFFpro-CYC1pro-EAR1(P398A/Y400A/F456A/P483A/Y485A) | This study    |
| pRS416-CPYpro-mCherry-PHO8                 | pRS416-CPYpro-mCherry-PHO8                                   | This study    |
| pRS305-VPS26                               | pRS305-VPS26                                                 | This study    |
| pRS305-VPS26(I251E/F368E)                  | pRS305-VPS26(I251E/F368E)                                    | This study    |
| pRS305-VPS26(F334E)                        | pRS305-VPS26(F334E)                                          | This study    |
| pRS305-VPS26(L285E)                        | pRS305-VPS26(L285E)                                          | This study    |
| pRS416-VPS26                               | pRS416-VPS26                                                 | This study    |
| pRS416-VPS26(I251E/F368E)                  | pRS416-VPS26(I251E/F368E)                                    | This study    |
| pRS416-VPS26(F334E)                        | pRS416-VPS26(F334E)                                          | This study    |
| pRS416-VPS26(L285E)                        | pRS416-VPS26(L285E)                                          | This study    |

## References

- Robinson, J.S., D.J. Klionsky, L.M. Banta, and S.D. Emr. 1988. Protein sorting in *Saccharomyces cerevisiae*: isolation of mutants defective in the delivery and processing of multiple vacuolar hydrolases. *Mol. Cell. Biol.* 8:4936–4948. <https://doi.org/10.1128/MCB.8.11.4936>
- Sikorski, R.S., and P. Hieter. 1989. A system of shuttle vectors and yeast host strains designed for efficient manipulation of DNA in *Saccharomyces cerevisiae*. *Genetics*. 122:19–27.
